# Supplementary material
Source: PubMed Central journal article supplement (PMC4507897)
Supplement: Shumway_EPAappendix.pdf [file Shumway_EPAappendix.pdf]

## Entrustable Professional Activity Worksheet<sup>a</sup>

| ACGME Competency            | MK | PC | ISC | P | PBLI | SBP |
|-----------------------------|----|----|-----|---|------|-----|
| Writing chemotherapy orders | X  | X  | X   | X |      | X   |

| Guidelines for Entrustable Professional Activities |                                                                                                                                                                                                                                                                                                                                                                                                                                                                                                                                                                                                                                                                                                                    |
|----------------------------------------------------|--------------------------------------------------------------------------------------------------------------------------------------------------------------------------------------------------------------------------------------------------------------------------------------------------------------------------------------------------------------------------------------------------------------------------------------------------------------------------------------------------------------------------------------------------------------------------------------------------------------------------------------------------------------------------------------------------------------------|
| 1. Title                                           | Writing chemotherapy orders                                                                                                                                                                                                                                                                                                                                                                                                                                                                                                                                                                                                                                                                                        |
| 2. Description                                     | In the outpatient setting, ensure the proper scheduling of systemic therapy for patients with hematologic and oncologic disorders and accurately write treatment orders.                                                                                                                                                                                                                                                                                                                                                                                                                                                                                                                                           |
| 3. Required knowledge, skills, and attitudes (KSA) | MK, PC, ISC, P, SBP <sup>d</sup><br><br>Recognize indications for treatment for hematologic and oncologic disorders in the outpatient setting. Discuss evidence for making treatment decisions and ensure patient understands prognosis and goals of care. Informed, witnessed consent must be obtained. Coordinate initiation of care with nursing team, administrative staff, pharmacy team, and chemotherapy education team. Ensure patient has adequate access devices if they are receiving intravenous therapy. Employ proper use of the medical literature as a basis for writing outpatient treatment orders. The trainee must complete these orders in a timely fashion to ensure faculty time to review. |
| 4. Information to assess progress                  | Direct observation, chemotherapy chart stimulated recall, multisource evaluation, in-service test scores, core lecture evaluations                                                                                                                                                                                                                                                                                                                                                                                                                                                                                                                                                                                 |
| 5. When is unsupervised practice expected?         | 2 <sup>nd</sup> or 3 <sup>rd</sup> year of fellowship                                                                                                                                                                                                                                                                                                                                                                                                                                                                                                                                                                                                                                                              |
| 6. Basis for formal entrustment decisions          | The Clinical Competency Committee will meet quarterly to review all evaluations ensuring the trainee is able to write chemotherapy orders with increasing levels of responsibility to allow for the independent practice upon graduation.                                                                                                                                                                                                                                                                                                                                                                                                                                                                          |

<sup>a</sup>Adapted from ten Cate,<sup>10</sup> 2013.

<sup>b</sup> Medical Knowledge, Patient Care, Interpersonal Communication Skills, Professionalism, Systems Based Practice

Shumway NM, Dacus JJ, Lathrop KL, Hernandez EP, Miller M, et al. Use of Milestones and Development of Entrustable Professional Activities in 2 Hematology/Oncology Training Programs. *J Grad Med Educ.* 2015;7(1):101-104.

## Entrustable Professional Activity Worksheet<sup>a</sup>

| ACGME Competency        | MK | PC | ISC | P | PBLI | SBP |
|-------------------------|----|----|-----|---|------|-----|
| Perform toxicity checks | X  | X  | X   | X | X    | X   |

| Guidelines for Entrustable Professional Activities        |                                                                                                                                                                                                                                                                                                                                                                                                                                                                                                                                                                       |
|-----------------------------------------------------------|-----------------------------------------------------------------------------------------------------------------------------------------------------------------------------------------------------------------------------------------------------------------------------------------------------------------------------------------------------------------------------------------------------------------------------------------------------------------------------------------------------------------------------------------------------------------------|
| <b>1. Title</b>                                           | Perform toxicity checks                                                                                                                                                                                                                                                                                                                                                                                                                                                                                                                                               |
| <b>2. Description</b>                                     | Recognize common and uncommon side effects of systemic therapy that require dose modification or cessation of treatment and ensure proper supportive care in these situations.                                                                                                                                                                                                                                                                                                                                                                                        |
| <b>3. Required knowledge, skills, and attitudes (KSA)</b> | MK, PC, ISC, P, PBLI, SBP <sup>b</sup><br><br>Understand mechanism of action of all drug classes used to treat hematologic and oncologic conditions and how to assess for toxicities of these drugs in a timely manner. Understand the importance of communicating treatment changes, delay or cessation of therapy to the entire medical team as well as involved consultants. The learner must be able to convey to the patient the reasons involved in changing treatment doses, medications or use of additional supportive care throughout the treatment course. |
| <b>4. Information to assess progress</b>                  | Direct observation, nursing evaluations, patient evaluations, pharmacy feedback forms, chart stimulated recall, in-service test scores, and mentor evaluations.                                                                                                                                                                                                                                                                                                                                                                                                       |
| <b>5. When is unsupervised practice expected?</b>         | 2 <sup>nd</sup> or 3 <sup>rd</sup> year of fellowship                                                                                                                                                                                                                                                                                                                                                                                                                                                                                                                 |
| <b>6. Basis for formal entrustment decisions</b>          | The Clinical Competency Committee will meet quarterly to review all evaluations ensuring the trainee is able to perform toxicity checks with increasing levels of responsibility to allow for the independent practice upon graduation.                                                                                                                                                                                                                                                                                                                               |

<sup>a</sup>Adapted from ten Cate,<sup>10</sup> 2013.

<sup>b</sup> Medical Knowledge, Patient Care, Interpersonal Communication Skills, Professionalism, Practice Based Learning and Improvement, Systems Based Practice

Shumway NM, Dacus JJ, Lathrop KL, Hernandez EP, Miller M, et al. Use of Milestones and Development of Entrustable Professional Activities in 2 Hematology/Oncology Training Programs. *J Grad Med Educ.* 2015;7(1):101-104.

## Entrustable Professional Activity Worksheet<sup>a</sup>

| ACGME Competency                             | MK | PC | ISC | P | PBLI | SBP |
|----------------------------------------------|----|----|-----|---|------|-----|
| Performing bone marrow biopsy and aspiration | X  | X  |     |   |      |     |

| Guidelines for Entrustable Professional Activities        |                                                                                                                                                                                                                                                                                                      |
|-----------------------------------------------------------|------------------------------------------------------------------------------------------------------------------------------------------------------------------------------------------------------------------------------------------------------------------------------------------------------|
| <b>1. Title</b>                                           | Performing bone marrow biopsy and aspiration                                                                                                                                                                                                                                                         |
| <b>2. Description</b>                                     | Needle aspiration and biopsy of adult bone marrow                                                                                                                                                                                                                                                    |
| <b>3. Required knowledge, skills, and attitudes (KSA)</b> | MK, PC <sup>b</sup><br><br>Know the indications, demonstrate technical skills, provides adequate specimens for appropriate processing. Video resource:<br><br><a href="http://www.nejm.org/doi/full/10.1056/NEJMvcm0804634">http://www.nejm.org/doi/full/10.1056/NEJMvcm0804634</a> <sup>c</sup>     |
| <b>4. Information to assess progress</b>                  | Immediate supervision by faculty or senior fellow; feedback on adequacy of specimen by hematopathology; bone marrow cadaver simulation lab evaluation                                                                                                                                                |
| <b>5. When is unsupervised practice expected?</b>         | After confident demonstration of technical skills and adequate specimen from 15 procedures in average patients, and at least 10 procedures in obese or morbidly obese patients. Most 2 <sup>nd</sup> year fellows will be expected to perform adequately and competently without direct supervision. |
| <b>6. Basis for formal entrustment decisions</b>          | The Clinical Competency Committee will meet quarterly to review all evaluations ensuring the trainee is able to perform bone marrow biopsies and aspiration with increasing levels of responsibility to allow for the independent practice upon graduation.                                          |

<sup>a</sup>Adapted from ten Cate,<sup>10</sup> 2013.

<sup>b</sup> Medical Knowledge, Patient Care

<sup>c</sup>New England Journal of Medicine website

Shumway NM, Dacus JJ, Lathrop KL, Hernandez EP, Miller M, et al. Use of Milestones and Development of Entrustable Professional Activities in 2 Hematology/Oncology Training Programs. *J Grad Med Educ.* 2015;7(1):101-104.

## Entrustable Professional Activity Worksheet<sup>a</sup>

| ACGME Competency         | MK | PC | ISC | P | PBLI | SBP |
|--------------------------|----|----|-----|---|------|-----|
| Provide end of life care |    | X  | X   | X |      | X   |

| Guidelines for Entrustable Professional Activities        |                                                                                                                                                                                                                                                                                                                                                                                                                                                                                          |
|-----------------------------------------------------------|------------------------------------------------------------------------------------------------------------------------------------------------------------------------------------------------------------------------------------------------------------------------------------------------------------------------------------------------------------------------------------------------------------------------------------------------------------------------------------------|
| <b>1. Title</b>                                           | Provide end of life care                                                                                                                                                                                                                                                                                                                                                                                                                                                                 |
| <b>2. Description</b>                                     | Provide expert end of life care for patients with terminal hematologic or oncologic disorders                                                                                                                                                                                                                                                                                                                                                                                            |
| <b>3. Required knowledge, skills, and attitudes (KSA)</b> | PC, ISC, P, SBP <sup>b</sup><br><br>Recognize when the risks of common therapies outweigh the benefits during treatments for terminal hematologic or malignant disorders. Elicit patient values and provide empathy to patient and family members. Ensure proper end of life discussion with patient and that it is well documented. Engage with palliative care and hospice services when appropriate. Facilitate communication between patient, caregivers, and palliative care teams. |
| <b>4. Information to assess progress</b>                  | Direct observation, multisource feedback, simulation exercise evaluation with standardized patients, chart stimulated recall                                                                                                                                                                                                                                                                                                                                                             |
| <b>5. When is unsupervised practice expected?</b>         | 2 <sup>nd</sup> or 3 <sup>rd</sup> year of fellowship                                                                                                                                                                                                                                                                                                                                                                                                                                    |
| <b>6. Basis for formal entrustment decisions</b>          | The Clinical Competency Committee will meet quarterly to review all evaluations ensuring the trainee is able to perform end of life care with increasing levels of responsibility to allow for the independent practice upon graduation.                                                                                                                                                                                                                                                 |

<sup>a</sup>Adapted from ten Cate,<sup>10</sup> 2013.

<sup>b</sup> Patient Care, Interpersonal Communication Skills, Professionalism, Systems Based Practice

Shumway NM, Dacus JJ, Lathrop KL, Hernandez EP, Miller M, et al. Use of Milestones and Development of Entrustable Professional Activities in 2 Hematology/Oncology Training Programs. *J Grad Med Educ.* 2015;7(1):101-104.
