# Supplementary material
Source: PubMed Central journal article supplement (PMC4507897)
Supplement: Shumway_MilestoneEvaluationappendix.pdf [file Shumway_MilestoneEvaluationappendix.pdf]

UTHSCSA/SAUSHEC Hematology/Oncology Fellowship PGY 4 Continuity Clinic Evaluation

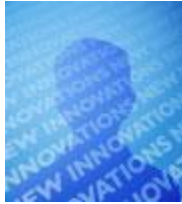

|                    |                     |
|--------------------|---------------------|
| [Subject Name]     | Evaluator           |
| [Subject Status]   | [Evaluator Name]    |
| [Subject Program]  | [Evaluator Status]  |
| [Evaluation Dates] | [Evaluator Program] |
| [Subject Rotation] |                     |

***Specific written comments by competency or in summary are requested. Comments MUST be included if "Needs Improvement" is selected for any item.***

Patient Care

With supervision, manage patients with common and complex clinical disorders seen in the practice of ambulatory hematology and medical oncology clinic.  
(Milestone Identifier PC-F5)

|                       |                       |                       |                       |
|-----------------------|-----------------------|-----------------------|-----------------------|
| Needs Improvement     | Meets Expectations    | Exceeds Expectations  | N/A                   |
| <input type="radio"/> | <input type="radio"/> | <input type="radio"/> | <input type="radio"/> |

Perform an accurate physical examination that is appropriately targeted to the patient's complaints and medical condition. Identify pertinent abnormalities using common maneuvers.  
(Milestone Identifier PC-B1)

|                       |                       |                       |                       |
|-----------------------|-----------------------|-----------------------|-----------------------|
| Needs Improvement     | Meets Expectations    | Exceeds Expectations  | N/A                   |
| <input type="radio"/> | <input type="radio"/> | <input type="radio"/> | <input type="radio"/> |

Synthesize all available data, including interview, physical examination and preliminary lab data, to define each patient's central clinical problem.  
(Milestone Identifier PC-C1)

|                       |                       |                       |                       |
|-----------------------|-----------------------|-----------------------|-----------------------|
| Needs Improvement     | Meets Expectations    | Exceeds Expectations  | N/A                   |
| <input type="radio"/> | <input type="radio"/> | <input type="radio"/> | <input type="radio"/> |

Medical Knowledge

Demonstrate sufficient knowledge regarding initial evaluation of benign hematologic disorders.  
(Milestone Identifier MK-A4)

|                       |                       |                       |                       |
|-----------------------|-----------------------|-----------------------|-----------------------|
| Needs Improvement     | Meets Expectations    | Exceeds Expectations  | N/A                   |
| <input type="radio"/> | <input type="radio"/> | <input type="radio"/> | <input type="radio"/> |

Demonstrate sufficient knowledge regarding evaluation of common outpatient oncology disorders.  
(Milestone Identifier MK – A5)

|                                                                                   |                                                                                   |                                                                                   |                                                                                     |
|-----------------------------------------------------------------------------------|-----------------------------------------------------------------------------------|-----------------------------------------------------------------------------------|-------------------------------------------------------------------------------------|
| Needs Improvement                                                                 | Meets Expectations                                                                | Exceeds Expectations                                                              | N/A                                                                                 |
|  |  |  |  |

Understand indications for and basic interpretation of common diagnostic testing, including but not limited to routine blood chemistries, hematologic studies, review of peripheral smears, and interpretation of staging radiographs.  
(Milestone Identifier MK-B1)

|                                                                                   |                                                                                   |                                                                                    |                                                                                     |
|-----------------------------------------------------------------------------------|-----------------------------------------------------------------------------------|------------------------------------------------------------------------------------|-------------------------------------------------------------------------------------|
| Needs Improvement                                                                 | Meets Expectations                                                                | Exceeds Expectations                                                               | N/A                                                                                 |
|  |  |  |  |

### PRACTICE-BASED LEARNING & IMPROVEMENT

Respond welcomingly and productively to feedback from all members of the health care team including faculty, peer residents, students, nurses, allied health workers, patients and their advocates.  
(Milestone Identifier PBLI - F1)

|                                                                                     |                                                                                     |                                                                                     |                                                                                       |
|-------------------------------------------------------------------------------------|-------------------------------------------------------------------------------------|-------------------------------------------------------------------------------------|---------------------------------------------------------------------------------------|
| Needs Improvement                                                                   | Meets Expectations                                                                  | Exceeds Expectations                                                                | N/A                                                                                   |
|  |  |  |  |

Customize clinical evidence for an individual patient.  
(Milestone Identifier PBLI - E2)

|                                                                                     |                                                                                     |                                                                                     |                                                                                       |
|-------------------------------------------------------------------------------------|-------------------------------------------------------------------------------------|-------------------------------------------------------------------------------------|---------------------------------------------------------------------------------------|
| Needs Improvement                                                                   | Meets Expectations                                                                  | Exceeds Expectations                                                                | N/A                                                                                   |
|  |  |  |  |

Effectively and efficiently search NLM databases for original clinical research articles. Utilize other resources such as the NCCN, ASCO, and ASH in order to customize up to date treatment plans.  
(Milestone Identifier PBLI - C2)

|                                                                                     |                                                                                     |                                                                                      |                                                                                       |
|-------------------------------------------------------------------------------------|-------------------------------------------------------------------------------------|--------------------------------------------------------------------------------------|---------------------------------------------------------------------------------------|
| Needs Improvement                                                                   | Meets Expectations                                                                  | Exceeds Expectations                                                                 | N/A                                                                                   |
|  |  |  |  |

Utilize other resources such as the NCCN, ASCO, and ASH in order to customize up to date treatment plans.  
(Milestone Identifier PBLI - C2)

Shumway NM, Dacus JJ, Lathrop KL, Hernandez EP, Miller M, et al. Use of Milestones and Development of Entrustable Professional Activities in 2 Hematology/Oncology Training Programs. *J Grad Med Educ.* 2015;7(1):101-104.

Needs Improvement      Meets Expectations      Exceeds Expectations      N/A

**INTERPERSONAL AND COMMUNICATION SKILLS**

Request consultative services in an effective manner.  
(Milestone Identifier ICS - E1)

Needs Improvement      Meets Expectations      Exceeds Expectations      N/A

Provide legible, accurate, complete, and timely written communication that is congruent with medical standards.  
(Milestone Identifier ICS-F1)

Needs Improvement      Meets Expectations      Exceeds Expectations      N/A

**PROFESSIONALISM**

Recognize the scope of his/her abilities and ask for supervision and assistance appropriately.  
(Milestone Identifier P-F5)

Needs Improvement      Meets Expectations      Exceeds Expectations      N/A

Ensure prompt completion of clinical, administrative and curricular tasks.  
(Milestone Identifier P-F3)

Needs Improvement      Meets Expectations      Exceeds Expectations      N/A

Treat patients with dignity, civility and respect, regardless of race, culture, gender, ethnicity, age or socioeconomic status.  
(Milestone Identifier P-I1)

Needs Improvement      Meets Expectations      Exceeds Expectations      N/A

Shumway NM, Dacus JJ, Lathrop KL, Hernandez EP, Miller M, et al. Use of Milestones and Development of Entrustable Professional Activities in 2 Hematology/Oncology Training Programs. *J Grad Med Educ.* 2015;7(1):101-104.

## SYSTEM BASED PRACTICE

Work effectively as a member within the interprofessional team to ensure safe patient care.  
(Milestone Identifier SBP-B2)

Needs Improvement

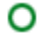

Meets Expectations

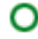

Exceeds Expectations

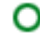

N/A

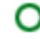

## OVERALL

List areas for improvement or aspirational goals

Comments

Remaining Characters: 5,000

Shumway NM, Dacus JJ, Lathrop KL, Hernandez EP, Miller M, et al. Use of Milestones and Development of Entrustable Professional Activities in 2 Hematology/Oncology Training Programs. *J Grad Med Educ.* 2015;7(1):101-104.



Understand prior probability and test performance characteristics.  
(Milestone Identifier MK-B3)

|                                                                                   |                                                                                   |                                                                                   |                                                                                     |
|-----------------------------------------------------------------------------------|-----------------------------------------------------------------------------------|-----------------------------------------------------------------------------------|-------------------------------------------------------------------------------------|
| Needs Improvement                                                                 | Meets Expectations                                                                | Exceeds Expectations                                                              | N/A                                                                                 |
|  |  |  |  |

## PRACTICE-BASED LEARNING & IMPROVEMENT

Engage in a quality improvement intervention.  
(Milestone Identifier PBLI-A5)

|                                                                                   |                                                                                   |                                                                                   |                                                                                     |
|-----------------------------------------------------------------------------------|-----------------------------------------------------------------------------------|-----------------------------------------------------------------------------------|-------------------------------------------------------------------------------------|
| Needs Improvement                                                                 | Meets Expectations                                                                | Exceeds Expectations                                                              | N/A                                                                                 |
|  |  |  |  |

Integrate clinical evidence, clinical context, and patient preferences into decision-making.  
(Milestone Identifier PBLI-E4)

|                                                                                     |                                                                                     |                                                                                     |                                                                                       |
|-------------------------------------------------------------------------------------|-------------------------------------------------------------------------------------|-------------------------------------------------------------------------------------|---------------------------------------------------------------------------------------|
| Needs Improvement                                                                   | Meets Expectations                                                                  | Exceeds Expectations                                                                | N/A                                                                                   |
|  |  |  |  |

With assistance appraise clinical guideline recommendations for bias.  
(Milestone Identifier PBLI-D2)

|                                                                                     |                                                                                     |                                                                                     |                                                                                       |
|-------------------------------------------------------------------------------------|-------------------------------------------------------------------------------------|-------------------------------------------------------------------------------------|---------------------------------------------------------------------------------------|
| Needs Improvement                                                                   | Meets Expectations                                                                  | Exceeds Expectations                                                                | N/A                                                                                   |
|  |  |  |  |

## INTERPERSONAL AND COMMUNICATION SKILLS

Recognize hospital assets available and when needed, effectively use an interpreter to engage patients in the clinical setting including patient education.  
(Milestone Identifier ICS-B1)

|                                                                                     |                                                                                     |                                                                                     |                                                                                       |
|-------------------------------------------------------------------------------------|-------------------------------------------------------------------------------------|-------------------------------------------------------------------------------------|---------------------------------------------------------------------------------------|
| Needs Improvement                                                                   | Meets Expectations                                                                  | Exceeds Expectations                                                                | N/A                                                                                   |
|  |  |  |  |

Appropriately counsel patients about the risks and benefits of outpatient chemotherapy administration.  
(Milestone Identifier ICS-A7)

Shumway NM, Dacus JJ, Lathrop KL, Hernandez EP, Miller M, et al. Use of Milestones and Development of Entrustable Professional Activities in 2 Hematology/Oncology Training Programs. *J Grad Med Educ.* 2015;7(1):101-104.

|                   |                    |                      |     |
|-------------------|--------------------|----------------------|-----|
| Needs Improvement | Meets Expectations | Exceeds Expectations | N/A |
| ○                 | ○                  | ○                    | ○   |

PROFESSIONALISM

Accept personal errors and honestly acknowledge them.  
(Milestone Identifier P-A3)

|                   |                    |                      |     |
|-------------------|--------------------|----------------------|-----|
| Needs Improvement | Meets Expectations | Exceeds Expectations | N/A |
| ○                 | ○                  | ○                    | ○   |

Effectively advocate for individual patient needs.  
(Milestone Identifier P-G2)

|                   |                    |                      |     |
|-------------------|--------------------|----------------------|-----|
| Needs Improvement | Meets Expectations | Exceeds Expectations | N/A |
| ○                 | ○                  | ○                    | ○   |

Serve as a professional role model for more junior colleagues.  
(Milestone Identifier P-F6)

|                   |                    |                      |     |
|-------------------|--------------------|----------------------|-----|
| Needs Improvement | Meets Expectations | Exceeds Expectations | N/A |
| ○                 | ○                  | ○                    | ○   |

SYSTEM BASED PRACTICE

Understand the mechanisms for analysis and correction of system errors.  
(Milestone Identifier SBP-C4)

|                   |                    |                      |     |
|-------------------|--------------------|----------------------|-----|
| Needs Improvement | Meets Expectations | Exceeds Expectations | N/A |
| ○                 | ○                  | ○                    | ○   |

Negotiate patient-centered care among multiple care providers.  
(Milestone Identifier SBP-A3)

|                   |                    |                      |     |
|-------------------|--------------------|----------------------|-----|
| Needs Improvement | Meets Expectations | Exceeds Expectations | N/A |
| ○                 | ○                  | ○                    | ○   |

Demonstrate how to manage the team by utilizing the skills and coordinating the activities of interprofessional team members.  
(Milestone Identifier SBP-B4)

Shumway NM, Dacus JJ, Lathrop KL, Hernandez EP, Miller M, et al. Use of Milestones and Development of Entrustable Professional Activities in 2 Hematology/Oncology Training Programs. *J Grad Med Educ.* 2015;7(1):101-104.

Needs Improvement

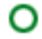

Meets Expectations

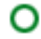

Exceeds Expectations

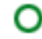

N/A

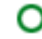

## OVERALL

List areas for improvement or aspirational goals

Comments

A rectangular text input area with a light gray background and a thin border. It features standard scrollbars on the right and bottom edges, indicating it is a scrollable text field.

Remaining Characters: 5,000

Shumway NM, Dacus JJ, Lathrop KL, Hernandez EP, Miller M, et al. Use of Milestones and Development of Entrustable Professional Activities in 2 Hematology/Oncology Training Programs. *J Grad Med Educ.* 2015;7(1):101-104.



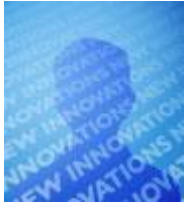

|                    |                     |
|--------------------|---------------------|
| [Subject Name]     | Evaluator           |
| [Subject Status]   | [Evaluator Name]    |
| [Subject Program]  | [Evaluator Status]  |
| [Evaluation Dates] | [Evaluator Program] |
| [Subject Rotation] |                     |

**Specific written comments by competency or in summary are requested. Comments MUST be included if "Needs Improvement" is selected for any item.**

### Patient Care

Manage complex or rare medical conditions.  
(Milestone Identifier PC-F9)

|                       |                       |                       |                       |
|-----------------------|-----------------------|-----------------------|-----------------------|
| Needs Improvement     | Meets Expectations    | Exceeds Expectations  | N/A                   |
| <input type="radio"/> | <input type="radio"/> | <input type="radio"/> | <input type="radio"/> |

Independently manage patient with a broad spectrum of clinical disorders seen in the practice of hematology/oncology continuity clinic.  
(Milestone Identifier PC-F8)

|                       |                       |                       |                       |
|-----------------------|-----------------------|-----------------------|-----------------------|
| Needs Improvement     | Meets Expectations    | Exceeds Expectations  | N/A                   |
| <input type="radio"/> | <input type="radio"/> | <input type="radio"/> | <input type="radio"/> |

Acquire accurate and relevant history from the patient in an efficiently customized prioritized and hypothesis-driven fashion.  
(Milestone Identifier PC-A1)

|                       |                       |                       |                       |
|-----------------------|-----------------------|-----------------------|-----------------------|
| Needs Improvement     | Meets Expectations    | Exceeds Expectations  | N/A                   |
| <input type="radio"/> | <input type="radio"/> | <input type="radio"/> | <input type="radio"/> |

### Medical Knowledge

Demonstrate sufficient knowledge to evaluate complex or rare medical conditions and multiple coexistent conditions.  
(Milestone Identifier MK-A7)

|                       |                       |                       |                       |
|-----------------------|-----------------------|-----------------------|-----------------------|
| Needs Improvement     | Meets Expectations    | Exceeds Expectations  | N/A                   |
| <input type="radio"/> | <input type="radio"/> | <input type="radio"/> | <input type="radio"/> |

Shumway NM, Dacus JJ, Lathrop KL, Hernandez EP, Miller M, et al. Use of Milestones and Development of Entrustable Professional Activities in 2 Hematology/Oncology Training Programs. *J Grad Med Educ.* 2015;7(1):101-104.

Understand the relevant pathophysiology and basic science for uncommon or complex hematologic and oncologic conditions.  
(Milestone Identifier MK-A8)

|                       |                       |                       |                       |
|-----------------------|-----------------------|-----------------------|-----------------------|
| Needs Improvement     | Meets Expectations    | Exceeds Expectations  | N/A                   |
| <input type="radio"/> | <input type="radio"/> | <input type="radio"/> | <input type="radio"/> |

## PRACTICE-BASED LEARNING & IMPROVEMENT

Take a leadership role in the education of all members of the health care team.  
(Milestone Identifier PBLI-H3)

|                       |                       |                       |                       |
|-----------------------|-----------------------|-----------------------|-----------------------|
| Needs Improvement     | Meets Expectations    | Exceeds Expectations  | N/A                   |
| <input type="radio"/> | <input type="radio"/> | <input type="radio"/> | <input type="radio"/> |

Identify areas in resident's own practice and local system that can be changed to improve the processes and outcomes of care.  
(Milestone Identifier PBLI-A4)

|                       |                       |                       |                       |
|-----------------------|-----------------------|-----------------------|-----------------------|
| Needs Improvement     | Meets Expectations    | Exceeds Expectations  | N/A                   |
| <input type="radio"/> | <input type="radio"/> | <input type="radio"/> | <input type="radio"/> |

Integrate teaching, feedback and evaluation with supervision of junior fellows', residents', and students' patient care.  
(Milestone Identifier PBLI-H2)

|                       |                       |                       |                       |
|-----------------------|-----------------------|-----------------------|-----------------------|
| Needs Improvement     | Meets Expectations    | Exceeds Expectations  | N/A                   |
| <input type="radio"/> | <input type="radio"/> | <input type="radio"/> | <input type="radio"/> |

## INTERPERSONAL AND COMMUNICATION SKILLS

Engage patient advocates in shared decision-making for difficult, ambiguous or controversial scenarios.  
(Milestone Identifier ICS-A6)

|                       |                       |                       |                       |
|-----------------------|-----------------------|-----------------------|-----------------------|
| Needs Improvement     | Meets Expectations    | Exceeds Expectations  | N/A                   |
| <input type="radio"/> | <input type="radio"/> | <input type="radio"/> | <input type="radio"/> |

Role model effective communication skills in challenging situations.  
(Milestone Identifier P-F2)

Shumway NM, Dacus JJ, Lathrop KL, Hernandez EP, Miller M, et al. Use of Milestones and Development of Entrustable Professional Activities in 2 Hematology/Oncology Training Programs. *J Grad Med Educ.* 2015;7(1):101-104.

|                                                                                   |                                                                                   |                                                                                   |                                                                                     |
|-----------------------------------------------------------------------------------|-----------------------------------------------------------------------------------|-----------------------------------------------------------------------------------|-------------------------------------------------------------------------------------|
| Needs Improvement                                                                 | Meets Expectations                                                                | Exceeds Expectations                                                              | N/A                                                                                 |
|  |  |  |  |

## PROFESSIONALISM

Maintain appropriate professional relationships with patients, families and staff.  
(Milestone Identifier P-F2)

|                                                                                   |                                                                                   |                                                                                   |                                                                                     |
|-----------------------------------------------------------------------------------|-----------------------------------------------------------------------------------|-----------------------------------------------------------------------------------|-------------------------------------------------------------------------------------|
| Needs Improvement                                                                 | Meets Expectations                                                                | Exceeds Expectations                                                              | N/A                                                                                 |
|  |  |  |  |

Recognize and manage obvious conflicts of interest, such as caring for family members and professional associates as patients.  
(Milestone Identifier P-E1)

|                                                                                   |                                                                                   |                                                                                   |                                                                                     |
|-----------------------------------------------------------------------------------|-----------------------------------------------------------------------------------|-----------------------------------------------------------------------------------|-------------------------------------------------------------------------------------|
| Needs Improvement                                                                 | Meets Expectations                                                                | Exceeds Expectations                                                              | N/A                                                                                 |
|  |  |  |  |

Recognize respond to and report impairment in colleagues or substandard care via peer review process.  
(Milestone Identifier P-C2)

|                                                                                     |                                                                                     |                                                                                     |                                                                                       |
|-------------------------------------------------------------------------------------|-------------------------------------------------------------------------------------|-------------------------------------------------------------------------------------|---------------------------------------------------------------------------------------|
| Needs Improvement                                                                   | Meets Expectations                                                                  | Exceeds Expectations                                                                | N/A                                                                                   |
|  |  |  |  |

## SYSTEM BASED PRACTICE

Demonstrate the incorporation of cost-awareness principles into complex clinical scenarios.  
(Milestone Identifier SBP-E4)

|                                                                                     |                                                                                     |                                                                                     |                                                                                       |
|-------------------------------------------------------------------------------------|-------------------------------------------------------------------------------------|-------------------------------------------------------------------------------------|---------------------------------------------------------------------------------------|
| Needs Improvement                                                                   | Meets Expectations                                                                  | Exceeds Expectations                                                                | N/A                                                                                   |
|  |  |  |  |

Partner with other healthcare team professionals to identify, propose improvement opportunities within the system.  
(Milestone Identifier SBP-C6)

|                                                                                     |                                                                                     |                                                                                     |                                                                                       |
|-------------------------------------------------------------------------------------|-------------------------------------------------------------------------------------|-------------------------------------------------------------------------------------|---------------------------------------------------------------------------------------|
| Needs Improvement                                                                   | Meets Expectations                                                                  | Exceeds Expectations                                                                | N/A                                                                                   |
|  |  |  |  |

Shumway NM, Dacus JJ, Lathrop KL, Hernandez EP, Miller M, et al. Use of Milestones and Development of Entrustable Professional Activities in 2 Hematology/Oncology Training Programs. *J Grad Med Educ.* 2015;7(1):101-104.

Demonstrate ability to understand and engage in a system level quality improvement initiative.  
(Milestone Identifier SBP-C5)

Needs Improvement   Meets Expectations   Exceeds Expectations   N/A

       

## OVERALL

List areas for improvement or aspirational goals

Comments

A text input field with a scroll bar and a character count below it. The field is currently empty.

Remaining Characters: 5,000

Shumway NM, Dacus JJ, Lathrop KL, Hernandez EP, Miller M, et al. Use of Milestones and Development of Entrustable Professional Activities in 2 Hematology/Oncology Training Programs. *J Grad Med Educ.* 2015;7(1):101-104.
